# Supplementary material for: Low Transmission of Chikungunya Virus by Aedes aegypti from Vientiane Capital, Lao PDR
Source: MDPI journal article supplement (doi:10.3390/pathogens12010031), 2022-12-25
Supplement: s1 [file s1]

**Table S1:** Infection, dissemination, transmission rates, and transmission efficiency at 3-, 7- and 14-days post-infection (dpi) for the CHIKV tested in this study.

|                   | 3 dpi                                                                                    |          |     | 7 dpi |          |     | 14 dpi |          |     |
|-------------------|------------------------------------------------------------------------------------------|----------|-----|-------|----------|-----|--------|----------|-----|
|                   | n                                                                                        | Positive | (%) | n     | Positive | (%) | n      | Positive | (%) |
|                   | <b>Infection rate (number of infected bodies / number of mosquitoes tested)</b>          |          |     |       |          |     |        |          |     |
| <b>H2013-445</b>  | 30                                                                                       | 2        | 7   | 30    | 6        | 20  | 29     | 11       | 38  |
| <b>H2019-9293</b> | 28                                                                                       | 14       | 50  | 30    | 10       | 33  | 30     | 16       | 53  |
|                   | $p < 0.05$                                                                               |          |     |       |          |     |        |          |     |
|                   | <b>Dissemination rate (number of infected heads / numbers of infected bodies)</b>        |          |     |       |          |     |        |          |     |
| <b>H2013-445</b>  | 2                                                                                        | 0        | 0   | 6     | 5        | 83  | 11     | 7        | 64  |
| <b>H2019-9293</b> | 14                                                                                       | 7        | 50  | 10    | 10       | 100 | 16     | 12       | 75  |
|                   | <b>Transmission rate (number of infected saliva / numbers of infected heads)</b>         |          |     |       |          |     |        |          |     |
| <b>H2013-445</b>  | 0                                                                                        | 0        | 0   | 5     | 1        | 20  | 7      | 0        | 0   |
| <b>H2019-9293</b> | 7                                                                                        | 1        | 14  | 10    | 0        | 0   | 12     | 2        | 17  |
|                   | <b>Transmission efficiency (number of infected saliva / number of mosquitoes tested)</b> |          |     |       |          |     |        |          |     |
| <b>H2013-445</b>  | 30                                                                                       | 0        | 0   | 30    | 1        | 3   | 29     | 0        | 0   |
| <b>H2019-9293</b> | 28                                                                                       | 1        | 4   | 30    | 0        | 0   | 30     | 2        | 7   |
